# Supplementary material
Source: publisher figshare collection journal article supplement (https://rs.figshare.com/ndownloader/files/7790455)
Supplement: Supplementary file 1 [file 7790455]

## Sheet: Table S11
LOCUS	CN_FATHER	CN_MOTHER	CN_SON	POPULATION-BASED ESTIMATE		TRIO-BASED ESTIMATE
	diplotype			gen.	prob.	gen.	prob
DEFB	3	4	4	22	0.842	22	0.842
DEFB	3	3	3	12;21	0.5	12	0.5
DEFB	2	3	2	11	1	11	1
DEFB	4	3	3	12;21	0.5	21	0.842
DEFB	4	5	5	23	0.428	23	0.82
DEFB	4	4	4	22	0.842	22	0.966
DEFB	4	6	5	23	0.428	23	0.586
DEFB	3	7	4	22	0.842	22	0.694
DEFB	4	2	3	12;21	0.5	21	1
DEFB	5	4	3	12;21	0.5	21	0.525
DEFB	7	4	6	24	0.34	42	0.619
DEFB	6	3	4	22	0.842	22	0.79
DEFB	3	5	2	11	1	11	1
CCL3L1	4	3	4	22	0.629	22	0.629
CCL3L1	5	7	7	25;52	0.295	25	0.502
CCL3L1	4	7	5	23;32	0.35	23	0.4094
CCL3L1	6	4	6	24;42	0.284	42	0.689
CCL3L1	4	2	3	12;21	0.5	21	1
CCL3L1	4	5	6	24;42	0.284	33	0.579
CCL3L1	4	3	3	12;21	0.5	21	0.628
CCL3L1	5	3	2	11	1	11	1
CCL3L1	2	3	2	11	1	11	1
CCL3L1	3	3	3	12;21	0.5	12;21	0.5
CCL3L1	3	3	4	22	0.629	22	1
CCL3L1	4	2	2	11	1	11	1
CCL3L1	3	5	5	23;32	0.35	23	0.7
CCL3L1	2	3	3	12;21	0.5	12	1
FCGR3A	2	2	2	11	0.99	11	0.99
FCGR3A	2	1	1	01;10	0.5	10	0.99
FCGR3A	1	2	2	11	0.99	11	0.99
FCGR3B	2	2	2	11	0.856	11	0.972
FCGR3B	2	4	3	12;21	0.5	12	1
FCGR3B	2	3	3	12;21	0.5	12	0.856
FCGR3B	1	2	1	01;10	0.5	01	0.856
FCGR3B	0	2	1	01;10	0.5	01	0.856
FCGR3B	1	1	0	00	1	00	1
FCGR3B	1	3	2	11	0.856	02;11	0.5
FCGR3B	3	2	4	22	1	22	1
FCGR3B	2	3	2	11	0.856	11	0.856
FCGR3B	2	1	2	11	0.856	11	0.856
FCGR3B	1	1	1	01;10	0.5	01;10	0.5
FCGR3B	1	2	2	11	0.856	11	0.856
FCGR2C	2	2	2	11	0.885	11	0.983
FCGR2C	2	2	3	12;21	0.5	12;21	0.5
FCGR2C	2	3	2	11	0.885	11	0.885
FCGR2C	2	3	3	12;21	0.5	12	0.885
FCGR2C	1	2	1	01;10	0.5	1	0.885
FCGR2C	0	2	1	01;10	0.5	01	1
FCGR2C	1	1	0	00	1	00	1
FCGR2C	1	3	2	11	0.885	02;11	0.5
FCGR2C	3	2	4	22	1	22	1
FCGR2C	2	1	2	11	0.885	11	0.885
FCGR2C	1	1	1	01;10	0.5	01;10	0.5

## Sheet: Table S13
Sample	DEFB CN	CCL3L1 CN	FCGR3A CN	FCGR3B CN	FCGR2C CN	HNA	Q57X	DEFB103
								Uncut_T_CladeI	Cut_C_CladeII
CO913	3	-	-	-	-	-	-	-	-
CO008	4	-	-	-	-	-	-	-	-
CO940	4	-	-	-	-	-	-	-	-
CO207	5	-	-	-	-	-	-	-	-
CO969	5	-	-	-	-	-	-	-	-
CO849	6	-	-	-	-	-	-	-	-
CO080	3	-	-	-	-	-	-	2	1
CO188	5	-	-	-	-	-	-	4	1
CO195	4	-	-	-	-	-	-	3	1
CO204	5	-	-	-	-	-	-	4	1
CO938	3	-	-	-	-	-	-	2	1
CO007	-	3	-	-	-	-	-	-	-
CO075	-	1	-	-	-	-	-	-	-
CO150	-	2	-	-	-	-	-	-	-
CO877	-	4	-	-	-	-	-	-	-
CO121	-	-	2	1	-	1a	-	-	-
CO939	-	-	1	2	-	1a1b	-	-	-
CO081	-	-	2	2	2	1a1b	XQ	-	-
CO909	-	-	2	2	2	1a1a	XQ	-	-
CO901	-	-	2	2	2	1a1a	XQ	-	-
CO029	-	-	2	3	3	1a1a1b	XXX	-	-
CO152	-	-	2	3	3	1a1b1b	XXX	-	-
CO210	-	-	2	3	3	1a1b1b	XXX	-	-
CO744	-	-	2	4	4	1a1a1b1b	XXXQ	-	-
Table S13 - Reference samples with known copy numbers from the European Collection of Cell Cultures (http://www.hpacultures.org.uk/collections/ecacc.jsp) used to normalize the values in the PRT technique.
